# Supplementary material
Source: publisher figshare collection journal article supplement (https://gsapubs.figshare.com/ndownloader/files/36017534)
Supplement: Supplementary file 1 [file 36017534]

## Sheet: Sheet1
	Table S1					2–0.5 μm
	Centrifuge conditions					d : Particle diameter (㎝)	5e-05
						ɳ : Solution Viscosity (gm/㎝・s)	0.01002
	d : Particle diameter (㎝)					σ-ρ :Relative density (gm/㎠)	1.5
	ɳ : Solution Viscosity (gm/㎝・s)					rmin: Minimum radius of gyration (㎝）	6
	σ : Particle density (gm/㎠)					rmax : Maximum radius of gyration (㎝）	11
						N : Number of revolutions per minute (rpm)	2000
	ρ : Solution density (gm/㎠)					g : Acceleartion due to gravity (cm/s²)	980.7
	r : Radius of gyration (㎝）					ω : 2πN/60	209.333
	N : Number of revolutions per minute (rpm)
						G(Rmin) : Centrifugal force	268.32
	G : Centrifugal force		G=1118*r*N²*10^(-8)			G(Rmax) : Centrifugal force	491.92
	V : Sedimentation velocity		V=(ｄ²/18)・((σ－ρ)/ɳ)・RCF			V(Rmin) : Sedimentation velocity (cm/s)	0.00547117
	S : Sedimentation coefficient		S=(ｄ²/18)・((σ－ρ)/ɳ)・10¹³			V(Rmin) : Sedimentation velocity (cm/min)	0.32827
	K : K factor		K=((In(Rmax)-In(Rmin))*10^13)/(3600*ω²）			V(Rmax) : Sedimentation velocity (cm/s)	0.0100305
	T : Sedimentation time (hrs)		T=K/S			V(Rmmax) : Sedimentation velocity (cm/min)	0.601829
						S : Sedimentation coefficient	207917
						K : K factor	38422.9
	>2 μm					T : Sedimentation time (hr)	0.184799
	d : Particle diameter (㎝)		0.00021			T : Sedimentation time (min)	11.0879
	ɳ : Solution Viscosity (gm/㎝・s)		0.01002			T :Sedimentation time (sec)	665.276
	σ-ρ :Relative density (gm/㎠)		1.5
	rmin: Minimum radius of gyration (㎝）		6
	rmax : Maximum radius of gyration (㎝）		11			<0.5 μm
	N : Number of revolutions per minute (rpm)		1000			d : Particle diameter (㎝)	1e-05
	g : Acceleartion due to gravity (cm/s²)		980.7			ɳ : Solution Viscosity (gm/㎝・s)	0.01002
	ω : 2πN/60		104.667			σ-ρ :Relative density (gm/㎠)	1.5
						rmin: Minimum radius of gyration (㎝）	6
	G(Rmin) : Centrifugal force		67.08			rmax : Maximum radius of gyration (㎝）	11
	G(Rmax) : Centrifugal force		122.98			N : Number of revolutions per minute (rpm)	6000
	V(Rmin) : Sedimentation velocity (cm/s)		0.0241279			g : Acceleartion due to gravity (cm/s²)	980.7
	V(Rmin) : Sedimentation velocity (cm/min)		1.44767			ω : 2πN/60	628
	V(Rmax) : Sedimentation velocity (cm/s)		0.0442344
	V(Rmmax) : Sedimentation velocity (cm/min)		2.65406			G(Rmin) : Centrifugal force	2414.88
	S : Sedimentation coefficient		3.66766e+06			G(Rmax) : Centrifugal force	4427.28
	K : K factor		153692			V(Rmin) : Sedimentation velocity (cm/s)	0.00196962
	T : Sedimentation time (hr)		0.0419045			V(Rmin) : Sedimentation velocity (cm/min)	0.118177
	T : Sedimentation time (min)		2.51427			V(Rmax) : Sedimentation velocity (cm/s)	0.00361097
	T :Sedimentation time (sec)		150.856			V(Rmmax) : Sedimentation velocity (cm/min)	0.216658
						S : Sedimentation coefficient	8316.7
						K : K factor	4269.22
						T : Sedimentation time (hr)	0.513331
						T : Sedimentation time (min)	30.7998
						T :Sedimentation time (sec)	1847.99
